# Supplementary material for: Reflex ROS1 IHC Screening with FISH Confirmation for Advanced Non-Small Cell Lung Cancer—A Cost-Efficient Strategy in a Public Healthcare System
Source: MDPI journal article supplement (doi:10.3390/curroncol28050284), 2021-08-25
Supplement: s1 [file s1]

## Supplementary Materials:

# Reflex ROS1 IHC Screening with FISH Confirmation for Advanced Non-Small Cell Lung Cancer—A Cost-Efficient Strategy in a Public Healthcare System

### Table of Contents

|                                                                                                                                                      |    |
|------------------------------------------------------------------------------------------------------------------------------------------------------|----|
| Figure S1. Decision tree model of testing strategies.....                                                                                            | 2  |
| Table S1. Model Parameter inputs.....                                                                                                                | 3  |
| Table S2. FISH test characteristics .....                                                                                                            | 5  |
| Table S3. IHC screening (followed by FISH confirmation) test characteristics.....                                                                    | 6  |
| Table S4. NGS test characteristics.....                                                                                                              | 7  |
| Table S5 Biomarker informed selection of <i>EGFR</i> , <i>ALK</i> wildtype samples for ROS1 IHC screening and FISH confirmation .....                | 8  |
| Table S6. Biomarker informed selection of <i>EGFR</i> , <i>ALK</i> , <i>KRAS</i> wildtype samples for ROS1 IHC screening and FISH confirmation ..... | 9  |
| Table S7. Clinical selection of <i>EGFR</i> , <i>ALK</i> wildtype samples in never-smokers for ROS1 IHC screening and FISH confirmation .....        | 10 |
| Table S8. ctDNA test characteristics.....                                                                                                            |    |
| Table S9. Variable Definitions .....                                                                                                                 | 12 |
| References.....                                                                                                                                      | 14 |

**Figure S1. Decision tree model of testing strategies**

(Figure S1 attached separately)

**Table S1. Model Parameter inputs.**

| Probabilities                                                  | Base-case | Variation   |             | Source                                           |
|----------------------------------------------------------------|-----------|-------------|-------------|--------------------------------------------------|
|                                                                |           | Lower Limit | Upper Limit |                                                  |
| <b>Assay Specificity and Sensitivity</b>                       |           |             |             |                                                  |
| FISH assay Sensitivity                                         | 0.96      | 0.95        | 0.99        | <sup>1</sup>                                     |
| FISH assay Specificity                                         | 0.96      | 0.95        | 0.99        | <sup>1</sup>                                     |
| NGS assay Sensitivity                                          | 0.84      | 0.78        | 0.99        | <sup>1</sup>                                     |
| NGS assay Specificity                                          | 0.99      | 0.98        | 0.99        | <sup>1, 2</sup>                                  |
| IHC assay Sensitivity                                          | 0.96      | 0.9         | 0.99        | <sup>3</sup> lower limit based on expert opinion |
| IHC assay Specificity                                          | 0.9       | 0.7         | 0.96        | <sup>3</sup> lower limit based on expert opinion |
| ctDNA Sensitivity                                              | 0.89      | 0.83        | 0.95        | Guardant360                                      |
| ctDNA Specificity                                              | 0.99      | 0.8         | 0.99        | Guardant360                                      |
| <b>ROS1 gene rearrangement prevalence</b>                      | 0.015     |             |             | <sup>1, 4-8</sup> , expert opinion. Not varied   |
| <b>Diagnostic strategies</b>                                   |           |             |             |                                                  |
| <b>ROS1 FISH</b>                                               |           |             |             |                                                  |
| Proportion of cohort who test positive                         | 0.054     | 0.025       | 0.064       |                                                  |
| PPV FISH                                                       | 0.268     | 0.224       | 0.601       |                                                  |
| NPV FISH                                                       | 0.999     | 0.999       | 0.9998      |                                                  |
| <b>ROS1 IHC then FISH</b>                                      |           |             |             |                                                  |
| Proportion testing positive after IHC                          | 0.113     | 0.135       | 0.165       |                                                  |
| Proportion of cohort who test positive after FISH confirmation | 0.157     | 0.135       | 0.165       |                                                  |
| PPV after IHC then FISH                                        | 0.778     | 0.735       | 0.935       |                                                  |
| NPV after IHC then FISH                                        | 0.994     | 0.992       | 0.999       |                                                  |
| <b>EGFR, ALK wildtype</b>                                      |           |             |             |                                                  |
| Proportion of cohort testing EGFR, ALK positive                | 0.20      |             |             | <sup>9, 10</sup>                                 |
| Proportion testing positive after IHC                          | 0.116     | 0.058       | 0.311       |                                                  |
| Proportion testing positive by FISH after IHC                  | 0.183     | 0.162       | 0.190       |                                                  |
| PPV after IHC then FISH                                        | 0.815     | 0.777       | 0.948       |                                                  |
| NPV after IHC then FISH                                        | 0.992     | 0.990       | 0.998       |                                                  |
| <b>EGFR, ALK, KRAS wildtype</b>                                |           |             |             |                                                  |
| Proportion of cohort testing EGFR, ALK, KRAS positive          | 0.45      |             |             | <sup>9-11</sup>                                  |
| Proportion testing positive after IHC                          | 0.123     | 0.066       | 0.316       |                                                  |
| Proportion testing positive by FISH after IHC                  | 0.235     | 0.218       | 0.241       |                                                  |
| PPV after IHC then FISH                                        | 0.866     | 0.836       | 0.964       |                                                  |
| NPV after IHC then FISH                                        | 0.989     | 0.986       | 0.997       |                                                  |
| <b>EGFR, ALK wildtype never-smokers</b>                        |           |             |             |                                                  |
| Proportion of never smokers                                    | 0.20      |             |             | <sup>12-15</sup>                                 |
| Proportion of EGFR and ALK positive cases among never-smokers  | 0.60      |             |             | <sup>16</sup>                                    |

|                                                                                  |       |       |        |    |
|----------------------------------------------------------------------------------|-------|-------|--------|----|
| Proportion of ROS1 positive cases among never-smokers, EGFR, ALK wild-type cases | 0.12  |       |        | 17 |
| Proportion testing positive after IHC                                            | 0.203 | 0.154 | 0.372  |    |
| Proportion testing positive by FISH after IHC                                    | 0.562 | 0.560 | 0.566  |    |
| PPV after IHC then FISH                                                          | 0.969 | 0.961 | 0.992  |    |
| NPV after IHC then FISH                                                          | 0.948 | 0.936 | 0.987  |    |
| <b>NGS</b>                                                                       |       |       |        |    |
| Proportion who test positive after NGS                                           | 0.022 | 0.016 | 0.031  |    |
| PPV NGS                                                                          | 0.561 | 0.373 | 0.938  |    |
| NPV NGS                                                                          | 0.998 | 0.997 | 0.9999 |    |
| <b>ctDNA</b>                                                                     |       |       |        |    |
| Proportion who test positive after ctDNA                                         | 0.023 | 0.015 | 0.209  |    |
| PPV ctDNA                                                                        | 0.575 | 0.059 | 0.935  |    |
| NPV ctDNA                                                                        | 0.998 | 0.997 | 0.999  |    |

**Table S2. FISH test characteristics**

|                           | <b>Disease positive (D+)</b> | <b>Disease negative (D-)</b> | <b>Total</b>     |
|---------------------------|------------------------------|------------------------------|------------------|
| <b>Test Positive (T+)</b> | A - True Positives (TP)      | B- False Positives (FP)      | A+B (TP+FP)      |
| <b>Test Negative (T-)</b> | C - False negatives (FN)     | D -True Negatives (TN)       | C+D (FN +TN)     |
|                           | A+C                          | B+ D                         | Cohort (A+B+C+D) |

|                                          | <b>Probabilities</b> | <b>Variation</b>   |                    |
|------------------------------------------|----------------------|--------------------|--------------------|
| <b>Assay Specificity and Sensitivity</b> |                      | <b>Lower Limit</b> | <b>Upper Limit</b> |
| FISH assay Sensitivity                   | 0.96                 | 0.95               | 0.99               |
| FISH assay Specificity                   | 0.96                 | 0.95               | 0.99               |
| ROS1 gene prevalence                     | 0.015                |                    |                    |

|                                  |                       | <b>Base Case</b> | <b>Variation</b> |        |
|----------------------------------|-----------------------|------------------|------------------|--------|
| <b>Population (Cohort)</b>       | Cohort*               | 1000.00          |                  |        |
| <b>Disease positive (D+)</b>     | ROS1 positive cases** | 15.00            |                  |        |
| <b>Disease negative (D-)</b>     | ROS1 negative cases   | 985.00           |                  |        |
| <b>A, TP</b>                     | Sensitivity X (D+)    | 14.40            | 14.25            | 14.85  |
| <b>C, FN</b>                     | (D+) - TP             | 0.60             | 0.75             | 0.15   |
| <b>D, TN</b>                     | Specificity X (D-)    | 945.60           | 935.75           | 975.15 |
| <b>B, FP</b>                     | (D-) - TN             | 39.40            | 49.25            | 9.85   |
| <b>Total Test positive (T+)</b>  | TP+ FP (A+B)          | 53.80            | 63.50            | 24.70  |
| <b>Total Test negative (T -)</b> | TN + FN (C+D)         | 946.20           | 936.50           | 975.30 |

|                                    |                 | <b>Base Case</b> | <b>Variation</b> |        |
|------------------------------------|-----------------|------------------|------------------|--------|
| <b>PPV</b>                         | A/(A+B)         | 0.268            | 0.224            | 0.601  |
| <b>NPV</b>                         | D/(C+D)         | 0.999            | 0.999            | 0.9998 |
| <b>Proportion testing positive</b> | Total T+/Cohort | 0.054            | 0.064            | 0.025  |

\*Assuming 1000 patients with advanced non-squamous NSCLC

\*\* Based on ROS1 fusion prevalence

**Table S3. IHC screening (followed by FISH confirmation) test characteristics**

|                                   | Probabilities | Variation   |             |
|-----------------------------------|---------------|-------------|-------------|
| Assay Specificity and Sensitivity |               | Lower Limit | Upper Limit |
| FISH assay Sensitivity            | 0.96          | 0.95        | 0.99        |
| FISH assay Specificity            | 0.96          | 0.95        | 0.99        |
| IHC assay Sensitivity             | 0.96          | 0.90        | 0.99        |
| IHC assay Specificity             | 0.9           | 0.70        | 0.96        |
| ROS1 gene prevalence              | 0.015         |             |             |

|                                 |                       | Base Case, IHC first | Variation |        | Base Case, IHC then FISH | Variation |       |
|---------------------------------|-----------------------|----------------------|-----------|--------|--------------------------|-----------|-------|
| <b>Population (Cohort)</b>      | Cohort*               | 1000.00              |           |        | 112.90                   |           |       |
| <b>Disease positive (D+)</b>    | ROS1 positive cases** | 15.00                |           |        | 14.40                    |           |       |
| <b>Disease negative (D-)</b>    | ROS1 negative cases   | 985.00               |           |        | 98.50                    |           |       |
| <b>A, TP</b>                    | Sensitivity X (D+)    | 14.40                | 13.50     | 14.85  | 13.82                    | 13.68     | 14.26 |
| <b>C, FN</b>                    | (D+) - TP             | 0.60                 | 1.50      | 0.15   | 0.58                     | 0.72      | 0.14  |
| <b>D, TN</b>                    | Specificity X (D-)    | 886.50               | 689.50    | 945.60 | 94.56                    | 93.58     | 97.52 |
| <b>B, FP</b>                    | (D-) - TN             | 98.50                | 295.50    | 39.40  | 3.94                     | 4.93      | 0.98  |
| <b>Total Test positive (T+)</b> | TP+ FP (A+B)          | 112.90               | 309.00    | 54.25  | 17.76                    | 18.61     | 15.24 |
| <b>Total Test negative (T-)</b> | TN + FN (C+D)         | 887.10               | 691.00    | 945.75 | 95.14                    | 94.30     | 97.66 |

| IHC                                |                 | Base Case | Variation |        |
|------------------------------------|-----------------|-----------|-----------|--------|
| <b>PPV</b>                         | A/(A+B)         | 0.128     | 0.044     | 0.274  |
| <b>NPV</b>                         | D/(C+D)         | 0.999     | 0.998     | 0.9998 |
| <b>Proportion testing positive</b> | Total T+/Cohort | 0.113     | 0.309     | 0.054  |

| FISH after IHC                     |                 | Base Case | Variation |       |
|------------------------------------|-----------------|-----------|-----------|-------|
| <b>PPV</b>                         | A/(A+B)         | 0.778     | 0.735     | 0.935 |
| <b>NPV</b>                         | D/(C+D)         | 0.994     | 0.992     | 0.999 |
| <b>Proportion testing positive</b> | Total T+/Cohort | 0.157     | 0.165     | 0.135 |

\*Assuming 1000 patients with advanced non-squamous NSCLC

\*\*Based on ROS1 fusion prevalence

**Table S4. NGS test characteristics**

|                                   | Probabilities | Variation   |             |
|-----------------------------------|---------------|-------------|-------------|
| Assay Specificity and Sensitivity |               | Lower Limit | Upper Limit |
| NGS assay Sensitivity             | 0.84          | 0.78        | 0.999       |
| NGS assay Specificity             | 0.99          | 0.98        | 0.999       |
| ROS1 gene prevalence              | 0.015         |             |             |

|                          |                       | Base Case | Variation |        |
|--------------------------|-----------------------|-----------|-----------|--------|
| Population (Cohort)      | Cohort*               | 1000.00   |           |        |
| Disease positive (D+)    | ROS1 positive cases** | 15.00     |           |        |
| Disease negative (D-)    | ROS1 negative cases   | 985.00    |           |        |
| A, TP                    | Sensitivity X (D+)    | 12.60     | 11.70     | 14.99  |
| C, FN                    | (D+) - TP             | 2.40      | 3.30      | 0.02   |
| D, TN                    | Specificity X (D-)    | 975.15    | 965.30    | 984.02 |
| B, FP                    | (D-) - TN             | 9.85      | 19.70     | 0.99   |
| Total Test positive (T+) | TP+ FP (A+B)          | 22.45     | 31.40     | 15.97  |
| Total Test negative (T-) | TN + FN (C+D)         | 977.55    | 968.60    | 984.03 |

|                             |                 | Base Case | Variation |         |
|-----------------------------|-----------------|-----------|-----------|---------|
| PPV                         | A/(A+B)         | 0.561     | 0.373     | 0.938   |
| NPV                         | D/(C+D)         | 0.998     | 0.997     | 0.99998 |
| Proportion testing positive | Total T+/Cohort | 0.022     | 0.031     | 0.016   |

\*Assuming 1000 patients with advanced non-squamous NSCLC

\*\*Based on ROS1 fusion prevalence

**Table S5 Biomarker informed selection of *EGFR*, *ALK* wildtype samples for ROS1 IHC screening and FISH confirmation**

|                                                                | Probabilities | Variation   |             |
|----------------------------------------------------------------|---------------|-------------|-------------|
| Assay Specificity and Sensitivity                              |               | Lower Limit | Upper Limit |
| FISH assay Sensitivity                                         | 0.96          | 0.95        | 0.99        |
| FISH assay Specificity                                         | 0.96          | 0.95        | 0.99        |
| IHC assay Sensitivity                                          | 0.96          | 0.90        | 0.99        |
| IHC assay Specificity                                          | 0.9           | 0.70        | 0.96        |
| Proportion of cohort testing <i>EGFR</i> , <i>ALK</i> positive | 0.2           |             |             |

|                                  |                     | Base Case, IHC first | Variation |        | Base Case, after FISH | Variation |       |
|----------------------------------|---------------------|----------------------|-----------|--------|-----------------------|-----------|-------|
| <b>Population (Cohort)</b>       | Cohort*             | 800.00               |           |        | 92.90                 |           |       |
| <b>Disease positive (D+)</b>     | ROS1 positive cases | 15.00                |           |        | 14.40                 |           |       |
| <b>Disease negative (D-)</b>     | ROS1 negative cases | 785.00               |           |        | 78.50                 |           |       |
| <b>A, TP</b>                     | Sensitivity X (D+)  | 14.40                | 13.50     | 14.85  | 13.82                 | 13.68     | 14.26 |
| <b>C, FN</b>                     | (D+) - TP           | 0.60                 | 1.50      | 0.15   | 0.58                  | 0.72      | 0.14  |
| <b>D, TN</b>                     | Specificity X (D-)  | 706.50               | 549.50    | 753.60 | 75.36                 | 74.58     | 77.72 |
| <b>B, FP</b>                     | (D-) - TN           | 78.50                | 235.50    | 31.40  | 3.14                  | 3.93      | 0.78  |
| <b>Total Test positive (T+)</b>  | TP+ FP (A+B)        | 92.90                | 249.00    | 46.25  | 16.96                 | 17.61     | 15.04 |
| <b>Total Test negative (T -)</b> | TN + FN (C+D)       | 707.10               | 551.00    | 753.75 | 75.94                 | 75.30     | 77.86 |

| IHC first                          |                 | Base Case | Variation |        |
|------------------------------------|-----------------|-----------|-----------|--------|
| <b>PPV</b>                         | A/(A+B)         | 0.155     | 0.054     | 0.321  |
| <b>NPV</b>                         | D/(C+D)         | 0.999     | 0.997     | 0.9998 |
| <b>Proportion testing positive</b> | Total T+/Cohort | 0.116     | 0.311     | 0.058  |

| FISH after IHC                     |                 | Base Case | Variation |       |
|------------------------------------|-----------------|-----------|-----------|-------|
| <b>PPV</b>                         | A/(A+B)         | 0.815     | 0.777     | 0.948 |
| <b>NPV</b>                         | D/(C+D)         | 0.992     | 0.990     | 0.998 |
| <b>Proportion testing positive</b> | Total T+/Cohort | 0.183     | 0.190     | 0.162 |

\*Based on proportion of patients who test positive for *EGFR*, *ALK* in a 1000 patient cohort



**Table S6. Biomarker informed selection of *EGFR*, *ALK*, *KRAS* wildtype samples for ROS1 IHC screening and FISH confirmation**

|                                                                              | Probabilities | Variation   |             |
|------------------------------------------------------------------------------|---------------|-------------|-------------|
| Assay Specificity and Sensitivity                                            |               | Lower Limit | Upper Limit |
| FISH assay Sensitivity                                                       | 0.96          | 0.95        | 0.99        |
| FISH assay Specificity                                                       | 0.96          | 0.95        | 0.99        |
| IHC assay Sensitivity                                                        | 0.96          | 0.90        | 0.99        |
| IHC assay Specificity                                                        | 0.9           | 0.70        | 0.96        |
| Proportion of cohort testing <i>EGFR</i> , <i>ALK</i> positive               | 0.2           |             |             |
| Proportion of cohort testing <i>EGFR</i> , <i>ALK</i> , <i>KRAS</i> negative | 0.55          |             |             |

|                                  |                       | Base Case, IHC first | Variation |        | Base Case, after FISH | Variation |       |
|----------------------------------|-----------------------|----------------------|-----------|--------|-----------------------|-----------|-------|
| <b>Population (Cohort)</b>       | Cohort*               | 550.00               |           |        | 67.90                 |           |       |
| <b>Disease positive (D+)</b>     | ROS1 positive cases** | 15.00                |           |        | 14.40                 |           |       |
| <b>Disease negative (D-)</b>     | ROS1 negative cases   | 535.00               |           |        | 53.50                 |           |       |
| <b>A, TP</b>                     | Sensitivity X (D+)    | 14.40                | 13.50     | 14.85  | 13.82                 | 13.68     | 14.26 |
| <b>C, FN</b>                     | (D+) - TP             | 0.60                 | 1.50      | 0.15   | 0.58                  | 0.72      | 0.14  |
| <b>D, TN</b>                     | Specificity X (D-)    | 481.50               | 374.50    | 513.60 | 51.36                 | 50.83     | 52.97 |
| <b>B, FP</b>                     | (D-) - TN             | 53.50                | 160.50    | 21.40  | 2.14                  | 2.68      | 0.54  |
| <b>Total Test positive (T+)</b>  | TP+ FP (A+B)          | 67.90                | 174.00    | 36.25  | 15.96                 | 16.36     | 14.79 |
| <b>Total Test negative (T -)</b> | TN + FN (C+D)         | 482.10               | 376.00    | 513.75 | 51.94                 | 51.55     | 53.11 |

| IHC first                          |                 | Base Case | Variation |        |
|------------------------------------|-----------------|-----------|-----------|--------|
| <b>PPV</b>                         | A/(A+B)         | 0.212     | 0.078     | 0.410  |
| <b>NPV</b>                         | D/(C+D)         | 0.999     | 0.996     | 0.9997 |
| <b>Proportion testing positive</b> | Total T+/Cohort | 0.123     | 0.316     | 0.066  |

| FISH after IHC                     |                 | Base Case | Variation |       |
|------------------------------------|-----------------|-----------|-----------|-------|
| <b>PPV</b>                         | A/(A+B)         | 0.866     | 0.836     | 0.964 |
| <b>NPV</b>                         | D/(C+D)         | 0.989     | 0.986     | 0.997 |
| <b>Proportion testing positive</b> | Total T+/Cohort | 0.235     | 0.241     | 0.218 |

\*Cohort of patients testing *EGFR*, *ALK*, *KRAS* wildtype

**Table S7. Clinical selection of *EGFR*, *ALK* wildtype samples in never-smokers for ROS1 IHC screening and FISH confirmation**

|                                                                                                       | Probabilities | Variation   |             |
|-------------------------------------------------------------------------------------------------------|---------------|-------------|-------------|
| Assay Specificity and Sensitivity                                                                     |               | Lower Limit | Upper Limit |
| FISH assay Sensitivity                                                                                | 0.96          | 0.95        | 0.99        |
| FISH assay Specificity                                                                                | 0.96          | 0.95        | 0.99        |
| IHC assay Sensitivity                                                                                 | 0.96          | 0.90        | 0.99        |
| IHC assay Specificity                                                                                 | 0.9           | 0.70        | 0.96        |
| Proportion of never smokers                                                                           | 0.2           |             |             |
| Proportion of <i>EGFR</i> , <i>ALK</i> positive among never-smokers                                   | 0.6           |             |             |
| Proportion of <i>ROS1</i> positive cases among never-smokers, <i>EGFR</i> , <i>ALK</i> negative cases | 0.12          |             |             |

|                                  |                       | Base Case, IHC first | Variation |       | Base Case, after FISH | Variation |      |
|----------------------------------|-----------------------|----------------------|-----------|-------|-----------------------|-----------|------|
| <b>Population (Cohort)</b>       | Cohort*               | 80.00                |           |       | 16.26                 |           |      |
| <b>Disease positive (D+)</b>     | ROS1 positive cases** | 9.60                 |           |       | 9.22                  |           |      |
| <b>Disease negative (D-)</b>     | ROS1 negative cases   | 70.40                |           |       | 7.04                  |           |      |
| <b>A, TP</b>                     | Sensitivity X (D+)    | 9.22                 | 8.64      | 9.50  | 8.85                  | 8.76      | 9.12 |
| <b>C, FN</b>                     | (D+) - TP             | 0.38                 | 0.96      | 0.10  | 0.37                  | 0.46      | 0.09 |
| <b>D, TN</b>                     | Specificity X (D-)    | 63.36                | 49.28     | 67.58 | 6.76                  | 6.69      | 6.97 |
| <b>B, FP</b>                     | (D-) - TN             | 7.04                 | 21.12     | 2.82  | 0.28                  | 0.35      | 0.07 |
| <b>Total Test positive (T+)</b>  | TP+ FP (A+B)          | 16.26                | 29.76     | 12.32 | 9.13                  | 9.11      | 9.19 |
| <b>Total Test negative (T -)</b> | TN + FN (C+D)         | 63.74                | 50.24     | 67.68 | 7.13                  | 7.15      | 7.06 |

| IHC first                          |                 | Base Case | Variation |        |
|------------------------------------|-----------------|-----------|-----------|--------|
| <b>PPV</b>                         | A/(A+B)         | 0.567     | 0.290     | 0.771  |
| <b>NPV</b>                         | D/(C+D)         | 0.994     | 0.981     | 0.9986 |
| <b>Proportion testing positive</b> | Total T+/Cohort | 0.203     | 0.372     | 0.154  |

| FISH after IHC                     |                 | Base Case | Variation |       |
|------------------------------------|-----------------|-----------|-----------|-------|
| <b>PPV</b>                         | A/(A+B)         | 0.969     | 0.961     | 0.992 |
| <b>NPV</b>                         | D/(C+D)         | 0.948     | 0.936     | 0.987 |
| <b>Proportion testing positive</b> | Total T+/Cohort | 0.562     | 0.560     | 0.566 |

\*Based on proportion of *EGFR*, *ALK* wildtype never-smokers

\*\*Based on estimated *ROS1* fusion prevalence among *EGFR*, *ALK* wildtype never-smokers

**Table S8. ctDNA test characteristics**

|                                   | Probabilities | Variation   |             |
|-----------------------------------|---------------|-------------|-------------|
| Assay Specificity and Sensitivity |               | Lower Limit | Upper Limit |
| ctDNA Sensitivity                 | 0.89          | 0.83        | 0.95        |
| ctDNA Specificity                 | 0.99          | 0.80        | 1.00        |
| ROS1 gene prevalence              | 0.015         |             |             |

|                                  |                       | Base Case | Variation |        |
|----------------------------------|-----------------------|-----------|-----------|--------|
| <b>Population (Cohort)</b>       | Cohort*               | 1000.00   |           |        |
| <b>Disease positive (D+)</b>     | ROS1 positive cases** | 15.00     |           |        |
| <b>Disease negative (D-)</b>     | ROS1 negative cases   | 985.00    |           |        |
| <b>A, TP</b>                     | Sensitivity X (D+)    | 13.35     | 12.45     | 14.25  |
| <b>C, FN</b>                     | (D+) - TP             | 1.65      | 2.55      | 0.75   |
| <b>D, TN</b>                     | Specificity X (D-)    | 975.15    | 788.00    | 984.02 |
| <b>B, FP</b>                     | (D-) - TN             | 9.85      | 197.00    | 0.99   |
| <b>Total Test positive (T+)</b>  | TP+ FP (A+B)          | 23.20     | 209.45    | 15.24  |
| <b>Total Test negative (T -)</b> | TN + FN (C+D)         | 976.80    | 790.55    | 984.77 |

|                                    |                 | Base Case | Variation |        |
|------------------------------------|-----------------|-----------|-----------|--------|
| <b>PPV</b>                         | $A/(A+B)$       | 0.575     | 0.059     | 0.935  |
| <b>NPV</b>                         | $D/(C+D)$       | 0.998     | 0.997     | 0.9992 |
| <b>Proportion testing positive</b> | Total T+/Cohort | 0.023     | 0.209     | 0.015  |

\*Assuming 1000 patients with advanced non-squamous NSCLC

\*\*Based on ROS1 fusion prevalence

**Table S9. Variable Definitions**

| <b><u>Name</u></b>                   | <b><u>Description</u></b>                                       | <b><u>Root<br/>Definition</u></b> | <b><u>Low</u></b> | <b><u>High</u></b> |
|--------------------------------------|-----------------------------------------------------------------|-----------------------------------|-------------------|--------------------|
| cCTDNA                               | Cost of ctDNA                                                   | 3300                              | 0.2               | 0.2                |
| cEGFRALK                             | Cost of EGFR + ALK                                              | 340                               | 0.2               | 0.2                |
| cFISH                                | Cost of FISH                                                    | 400                               | 0.2               | 0.2                |
| cIHC                                 | Cost of IHC                                                     | 100                               | 0.2               | 0.2                |
| cKRAS                                | Cost of KRAS testing                                            | 200                               | 0.2               | 0.2                |
| cNGS                                 | Cost of NGS                                                     | 1000                              | 0.2               | 0.2                |
| cNo_Rebiopsy                         | Cost of no re-biopsy                                            | 120                               | 0                 | 120                |
| cRe_Biopsy                           | Cost of re-biopsy                                               | 1500                              | 0                 | 1500               |
| NPV_FISH                             | NPV FISH reflex                                                 | 0.999                             | 0.999             | 0.9998             |
| NPVafterctDNA                        | NPV after ctDNA testing                                         | 0.998                             | 0.997             | 0.999              |
| NPVafterIHC                          | NPV after IHC (TP)                                              | 0.994                             | 0.992             | 0.999              |
| NPVafterIHCEGFRALKKRASneg            | NPV after EGFR, ALK, KRAS                                       | 0.989                             | 0.986             | 0.997              |
| NPVafterIHCEGFRALKneg                | NPV after EGFR, ALK                                             | 0.992                             | 0.99              | 0.998              |
| NPVNever smoker                      | NPV after Never-smoker, EGFR, ALK                               | 0.948                             | 0.963             | 0.987              |
| NPVNGS                               | NPV after NGS                                                   | 0.998                             | 0.997             | 0.9999             |
| pEGFRALKKRASpos                      | Proportion EGFR, ALK, KRAS positive                             | 0.45                              | 0                 | 0.45               |
| pEGFRALKpos                          | Proportion EGFR, ALK positive                                   | 0.2                               | 0                 | 0.2                |
| pEGFRALKposamongneversmokers         | Proportion Never-smokers, EGFR, ALK positive                    | 0.6                               | 0                 | 0.6                |
| pFISHposafterIHCEGFRALK              | Proportion FISH positive after IHC (EGFR, ALK wt)               | 0.183                             | 0.162             | 0.19               |
| pFISHposafterIHCEGFRALKKRAS          | Proportion FISH positive after IHC (EGFR, ALK, KRAS wt)         | 0.235                             | 0.218             | 0.241              |
| pFISHposafterIHCEGFRALKwtneversmoker | Proportion FISH positive after IHC (Never-smoker, EGFR, ALK wt) | 0.562                             | 0.56              | 0.566              |
| pFISHpositiveafterIHC                | Proportion FISH positive after IHC (all comers)                 | 0.157                             | 0.135             | 0.165              |
| pIHCposafterEGFRALK                  | Proportion IHC positive if EGFR ALK wt                          | 0.116                             | 0.058             | 0.311              |
| pIHCposafterEGFRALKKRAS              | Proportion IHC positive if EGFR ALK, KRAS wt                    | 0.123                             | 0.066             | 0.316              |
| pIHCposamongEGFRALKwtneversmokers    | Proportion IHC positive if Never-smoker, EGFR ALK wt            | 0.203                             | 0.154             | 0.372              |
| pNever smoker                        | Proportion of neversmokers                                      | 0.2                               | 0                 | 0.2                |
| PPV_FISH                             | PPV FISH                                                        | 0.268                             | 0.224             | 0.601              |
| PPVafterctDNA                        | PPV after ctDNA testing                                         | 0.575                             | 0.059             | 0.935              |

|                        |                                                  |        |       |       |
|------------------------|--------------------------------------------------|--------|-------|-------|
| PPVafterIHC            | PPV FISH after IHC                               | 0.778  | 0.735 | 0.935 |
| PPVafterIHCEGFRALK     | PPV FISH after IHC (EGFR, ALK wt)                | 0.815  | 0.777 | 0.948 |
| PPVafterIHCEGFRALKKRAS | PPV FISH after IHC (EGFR, ALK, KRAS wt)          | 0.866  | 0.836 | 0.964 |
| PPVneversmoker         | PPV FISH after IHC (Never-smokers, EGFR, ALK wt) | 0.969  | 0.961 | 0.992 |
| PPVNGS                 | PPV after NGS                                    | 0.561  | 0.373 | 0.938 |
| pTestpositivectDNA     | Proportion ROS1 positive with ctDNA (TP+FP)      | 0.0232 | 0.015 | 0.209 |
| pTestpositiveFISH      | Proportion ROS1 positive after FISH (TP+FP)      | 0.0538 | 0.025 | 0.064 |
| pTestpositiveIHC       | Proportion IHC positive (TP+FP)                  | 0.113  | 0.054 | 0.309 |
| pTestpositiveNGS       | Proportion NGS positive (TP+FP)                  | 0.022  | 0.016 | 0.031 |
| TATclinician           | Time to clinician visit                          | 14     | 0.2   | 0.2   |
| TATctDNA               | Turnaround time ctDNA                            | 7      | 0.2   | 0.2   |
| TATEGFRALK             | Turnaround time for EGFR, ALK testing            | 7      | 0.2   | 0.2   |
| TATFISH                | Turnaround time FISH                             | 7      | 0.2   | 0.2   |
| TATIHC                 | Turnaround time ROS1 IHC                         | 4      | 0.2   | 0.2   |
| TATKRAS                | Turnaround time KRAS                             | 21     | 0.2   | 0.2   |
| TATNGS                 | Turnaround time NGS                              | 21     | 0.2   | 0.2   |

## References

1. Davies KD, Le AT, Sheren J, et al. Comparison of Molecular Testing Modalities for Detection of ROS1 Rearrangements in a Cohort of Positive Patient Samples. Research Support, N.I.H., Extramural. *J Thorac Oncol*. Oct 2018;13(10):1474-1482. doi:10.1016/j.jtho.2018.05.041
2. Velizheva NP, Rechsteiner MP, Valtcheva N, et al. Targeted next-generation-sequencing for reliable detection of targetable rearrangements in lung adenocarcinoma-a single center retrospective study. *Pathol Res Pract*. Apr 2018;214(4):572-578. doi:10.1016/j.prp.2018.02.001
3. Lindeman NI, Cagle PT, Aisner DL, et al. Updated Molecular Testing Guideline for the Selection of Lung Cancer Patients for Treatment With Targeted Tyrosine Kinase Inhibitors: Guideline From the College of American Pathologists, the International Association for the Study of Lung Cancer, and the Association for Molecular Pathology. *J Thorac Oncol*. 03 2018;13(3):323-358. doi:10.1016/j.jtho.2017.12.001
4. Bergethon K, Shaw AT, Ou SH, et al. ROS1 rearrangements define a unique molecular class of lung cancers. Research Support, N.I.H., Extramural Research Support, Non-U.S. Gov't. *J Clin Oncol*. Mar 10 2012;30(8):863-70. doi:10.1200/jco.2011.35.6345
5. Go H, Kim DW, Kim D, et al. Clinicopathologic analysis of ROS1-rearranged non-small-cell lung cancer and proposal of a diagnostic algorithm. *J Thorac Oncol*. Nov 2013;8(11):1445-50. doi:10.1097/JTO.0b013e3182a4dd6e
6. Takeuchi K, Soda M, Togashi Y, et al. RET, ROS1 and ALK fusions in lung cancer. Research Support, Non-U.S. Gov't. *Nat Med*. Feb 12 2012;18(3):378-81. doi:10.1038/nm.2658
7. Yoshida A, Kohno T, Tsuta K, et al. ROS1-rearranged lung cancer: a clinicopathologic and molecular study of 15 surgical cases. Research Support, Non-U.S. Gov't. *Am J Surg Pathol*. Apr 2013;37(4):554-62. doi:10.1097/PAS.0b013e3182758fe6
8. Rimkunas VM, Crosby KE, Li D, et al. Analysis of receptor tyrosine kinase ROS1-positive tumors in non-small cell lung cancer: identification of a FIG-ROS1 fusion. *Clin Cancer Res*. Aug 15 2012;18(16):4449-57. doi:10.1158/1078-0432.ccr-11-3351
9. Ellis PM, Verma S, Sehdev S, Younus J, Leighl NB. Challenges to implementation of an epidermal growth factor receptor testing strategy for non-small-cell lung cancer in a publicly funded health care system. *J Thorac Oncol*. Sep 2013;8(9):1136-41. doi:10.1097/JTO.0b013e31829f6a43
10. Hallberg B, Palmer RH. Mechanistic insight into ALK receptor tyrosine kinase in human cancer biology. *Nat Rev Cancer*. Oct 2013;13(10):685-700. doi:10.1038/nrc3580
11. Kris MG, Johnson BE, Kwiatkowski DJ, et al. Identification of driver mutations in tumor specimens from 1,000 patients with lung adenocarcinoma: The NCI's Lung Cancer Mutation Consortium (LCMC). *Journal of Clinical Oncology*. 2011/05/20 2011;29(15\_suppl):CRA7506-CRA7506. doi:10.1200/jco.2011.29.15\_suppl.cra7506

12. Cho J, Choi SM, Lee J, et al. Proportion and clinical features of never-smokers with non-small cell lung cancer. *Chinese Journal of Cancer*. 2017/02/08 2017;36(1):20. doi:10.1186/s40880-017-0187-6
13. Pelosof L, Ahn C, Gao A, et al. Proportion of Never-Smoker Non-Small Cell Lung Cancer Patients at Three Diverse Institutions. *Journal of the National Cancer Institute*. 2017;109(7):djw295. doi:10.1093/jnci/djw295
14. Santoro IL, Ramos RP, Franceschini J, Jamnik S, Fernandes ALG. Non-small cell lung cancer in never smokers: a clinical entity to be identified. *Clinics (Sao Paulo, Brazil)*. 2011;66(11):1873-1877. doi:10.1590/s1807-59322011001100005
15. Dias M, Linhas R, Campainha S, Conde S, Barroso A. Lung cancer in never-smokers – what are the differences? *Acta Oncologica*. 2017/07/03 2017;56(7):931-935. doi:10.1080/0284186X.2017.1287944
16. Korpanty GJ, Kamel-Reid S, Pintilie M, et al. Lung cancer in never smokers from the Princess Margaret Cancer Centre. *Oncotarget*. Apr 2018;9(32):22559-22570. doi:10.18632/oncotarget.25176
17. Marchetti A, Barberis M, Di Lorito A, et al. ROS1 Gene Fusion in Advanced Lung Cancer in Women: A Systematic Analysis, Review of the Literature, and Diagnostic Algorithm. *JCO Precision Oncology*. 2017/11/01 2017;(1):1-9. doi:10.1200/PO.16.00010
