# Supplementary material for: Reflex ROS1 IHC Screening with FISH Confirmation for Advanced Non-Small Cell Lung Cancer—A Cost-Efficient Strategy in a Public Healthcare System
Source: MDPI journal article supplement (doi:10.3390/curroncol28050284), 2021-08-25

New model

cCTDNA = 3300  
cEGFRALK = 340  
cFISH = 400  
cIHC = 100  
cKRAS = 200  
cNGS = 1000  
NPV\_FISH = 0.999  
NPVafterctDNA = 0.998  
NPVafterIHC = 0.994  
NPVafterHCEGFR... = 0.989  
NPVafterHCEGFR... = 0.992  
NPVNeversmoker = 0.948  
NPVNGS = 0.998  
pEGFRALKKRASpos = 0.45  
pEGFRALKpos = 0.2  
pEGFRALKposamo... = 0.6  
pFISHposafterHCE... = 0.183  
pFISHposafterHCE... = 0.235  
pFISHposafterHCE... = 0.562  
pFISHposiveafter... = 0.157  
pIHCposafterEGFR... = 0.116  
pIHCposafterEGFR... = 0.123  
pIHCposamongEG... = 0.203  
pNeversmoker = 0.2  
PPV\_FISH = 0.268  
PPVafterctDNA = 0.575  
PPVafterIHC = 0.778  
PPVafterHCEGFR... = 0.815  
PPVafterHCEGFR... = 0.866  
PPVneversmoker = 0.969  
PPVNGS = 0.561  
pRe\_Biopsy = 0.15  
pTestpositivectDNA = 0.0232  
pTestpositiveFISH = 0.0538  
pTestpositiveIHC = 0.113  
pTestpositiveNGS = 0.022  
TATClinician = 14  
TATctDNA = 7  
TATEGFRALK = 7  
TATFISH = 7  
TATIHC = 4  
TATKRAS = 21  
TATNGS = 21

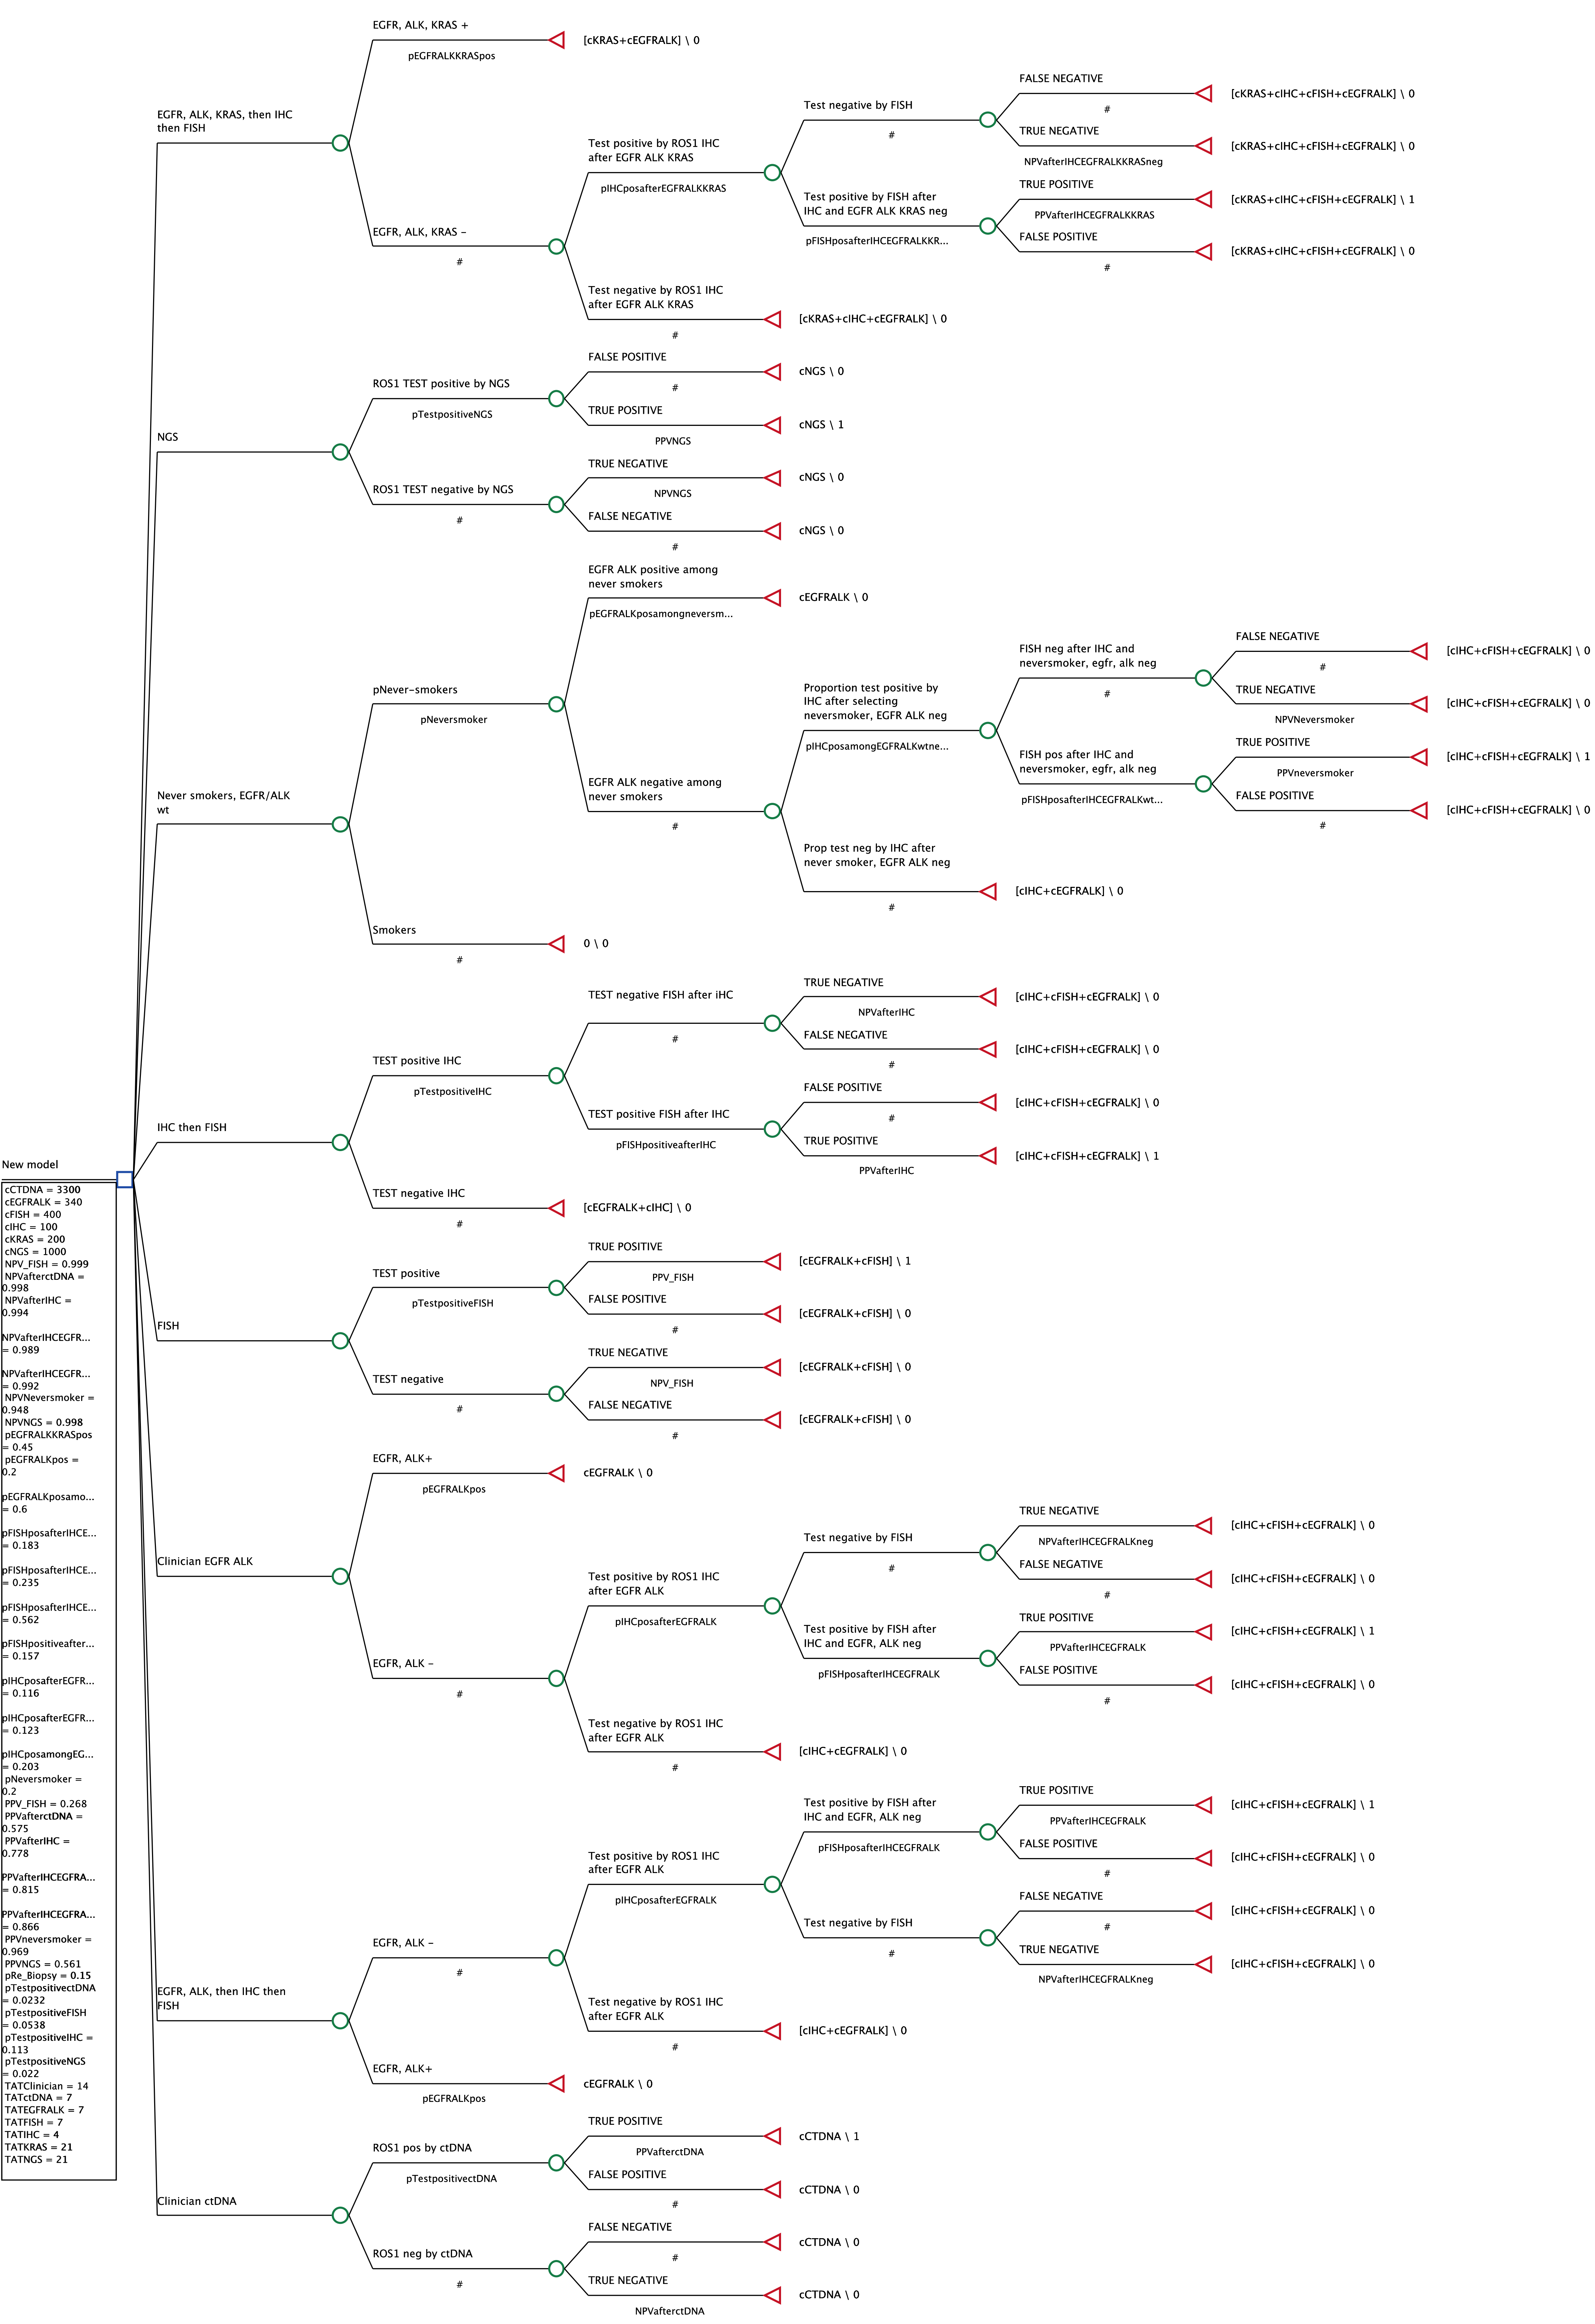

Supplement: s1 [file s1]
